# Supplementary material for: Building a Z-scheme heterojunction with Keggin-type heteropolymer modified two-dimensional g-C3N4 for significant photocatalytic performance
Source: Royal Society of Chemistry journal article supplement (doi:10.1039/d2nj03132a), 2022-09-29
Supplement: d2nj03132a1.pdf [file d2nj03132a1.pdf]

## Supporting Information

### **Building Z-scheme Heterojunction with Keggin-type Heteropolymers Modified Two-dimensional g-C<sub>3</sub>N<sub>4</sub> for Significantly Photocatalytic Performance**

Huimin Han<sup>a</sup>, Jinyuan Liu<sup>b,\*</sup>, Bin Wang<sup>b</sup>, Shumin Zhu<sup>b</sup>, Shihao Jia<sup>a</sup>, Qi Tang<sup>a</sup>, Yingjie Hua<sup>a,\*</sup>,  
Huaming Li<sup>b</sup>, Chongtai Wang<sup>a</sup>, Hui Xu<sup>b,\*</sup>

*<sup>a</sup> School of Chemistry and Chemical Engineering of Hainan Normal University, Key Laboratory of Electrochemical Energy Storage and Energy Conversion of Hainan Province, Key Laboratory of Electrochemical Energy Storage and Light Energy Conversion Materials of Haikou City, Haikou, 571158, P.R. China.*

*<sup>b</sup> Institute for Energy Research, Jiangsu University, Zhenjiang 212013, Jiangsu, P. R. China*

**\*Corresponding author:** [jyliu@ujs.edu.cn](mailto:jyliu@ujs.edu.cn); [521000hua282@sina.com](mailto:521000hua282@sina.com); [xh@ujs.edu.cn](mailto:xh@ujs.edu.cn)

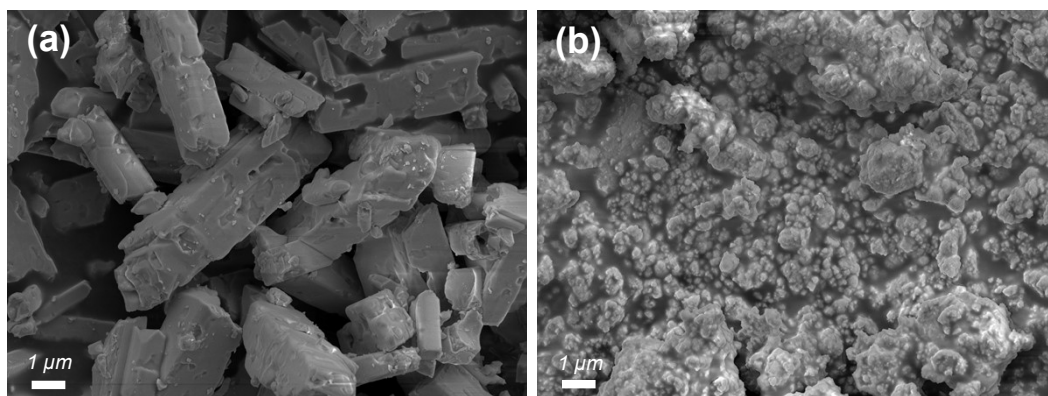

**Fig. S1.** SEM images of (a)  $\text{Cs}_5\text{PW}_{11}\text{Co}$  and (b)  $\text{Cs}_4\text{PW}_{11}\text{Fe}$

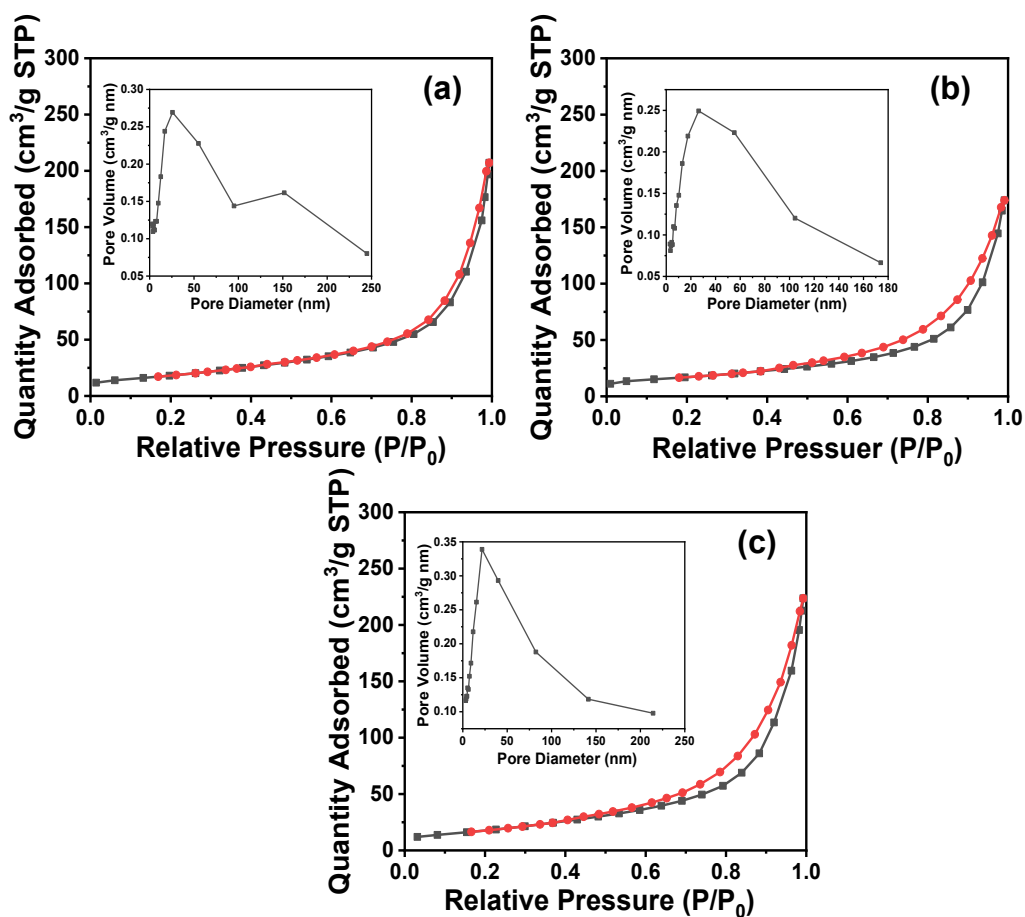

**Fig. S2.**  $\text{N}_2$  adsorption-desorption isotherms and the corresponding pore size distribution curves of (a)  $\text{g-C}_3\text{N}_4$ , (b) 3 wt.%  $\text{Cs}_5\text{PW}_{11}\text{Co}/\text{g-C}_3\text{N}_4$ , (c) 3 wt.%  $\text{Cs}_4\text{PW}_{11}\text{Fe}/\text{g-C}_3\text{N}_4$

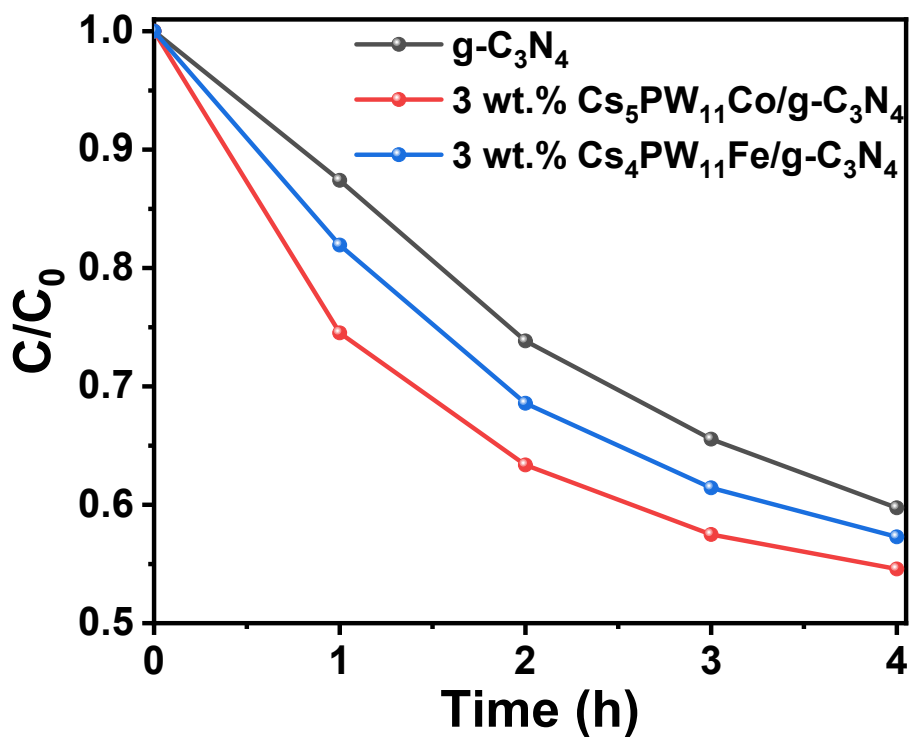

Fig. S3. Trapping experiment of active species during the photocatalytic degradation of BPA over 3 wt.% Cs<sub>5</sub>PW<sub>11</sub>Co/g-C<sub>3</sub>N<sub>4</sub> and 3 wt.% Cs<sub>4</sub>PW<sub>11</sub>Fe/g-C<sub>3</sub>N<sub>4</sub> under visible light irradiation

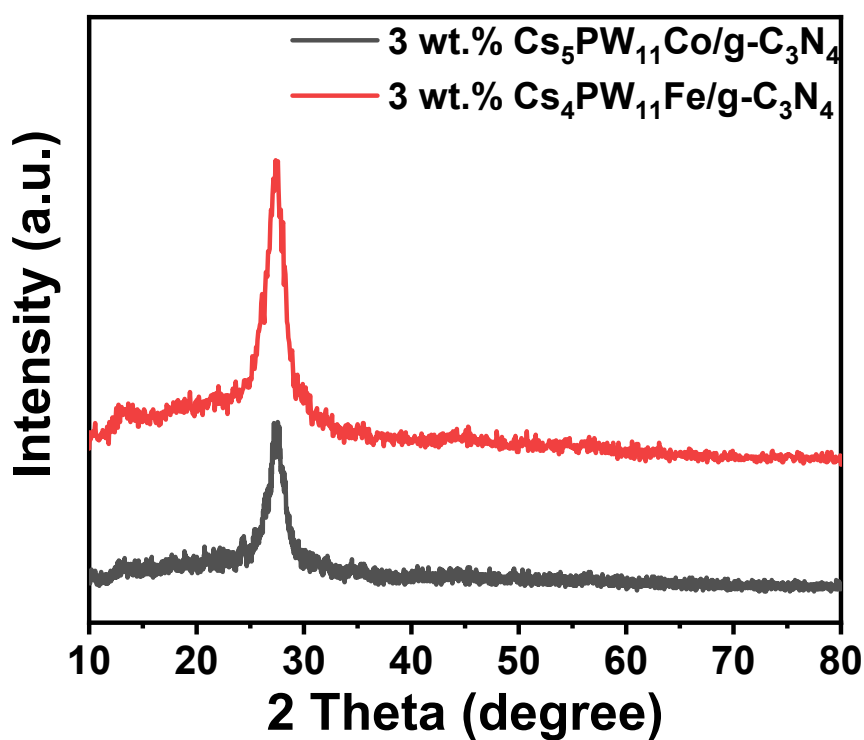

Fig. S4. XRD patterns of the 3 wt.% Cs<sub>5</sub>PW<sub>11</sub>Co/g-C<sub>3</sub>N<sub>4</sub> and 3 wt.% Cs<sub>4</sub>PW<sub>11</sub>Fe/g-C<sub>3</sub>N<sub>4</sub> materials after the cycling photocatalytic experiments.

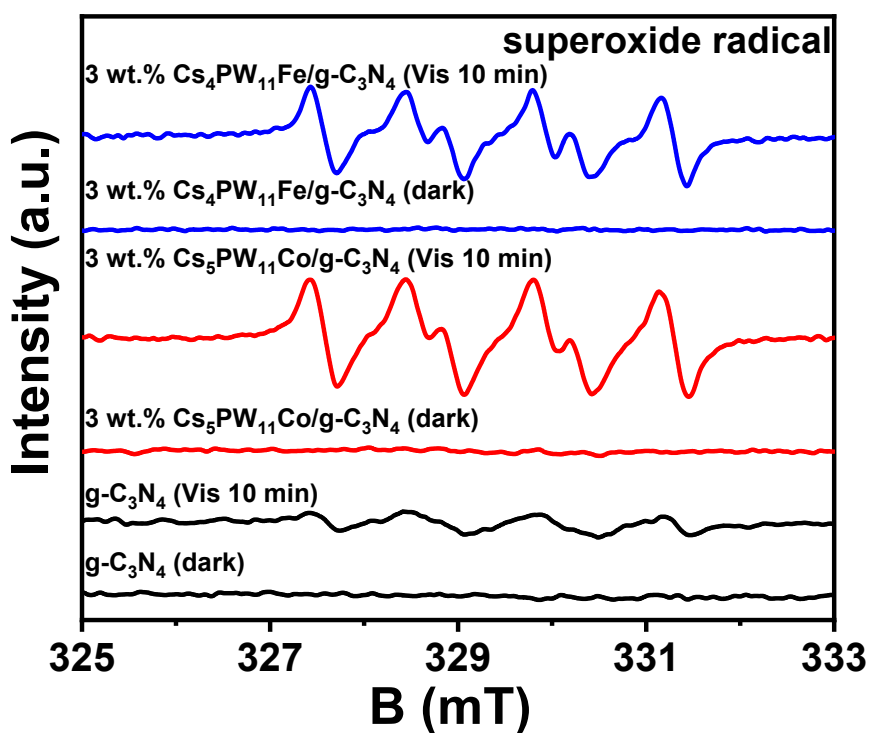

**Fig. S5.** ESR spectrum of 3 wt.%  $\text{Cs}_x\text{PW}_{11}\text{M/g-C}_3\text{N}_4$  ( $\text{M}=\text{Co}, \text{Fe}$ ) and 2D  $\text{g-C}_3\text{N}_4$  radical trapped by DMPO:  $\cdot\text{O}_2^-$  radical species under visible light irradiation and in dark

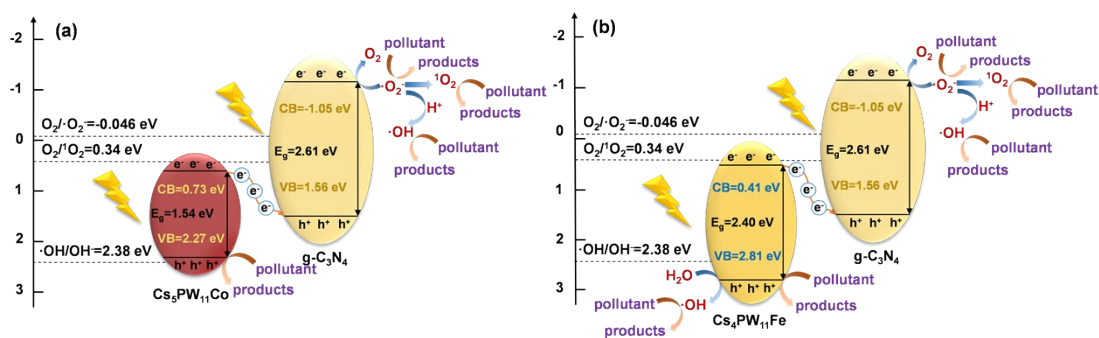

**Fig. S6.** The possible photocatalytic mechanism in (a)  $\text{Cs}_5\text{PW}_{11}\text{Co/g-C}_3\text{N}_4$  system and (b)  $\text{Cs}_4\text{PW}_{11}\text{Fe/g-C}_3\text{N}_4$  system.

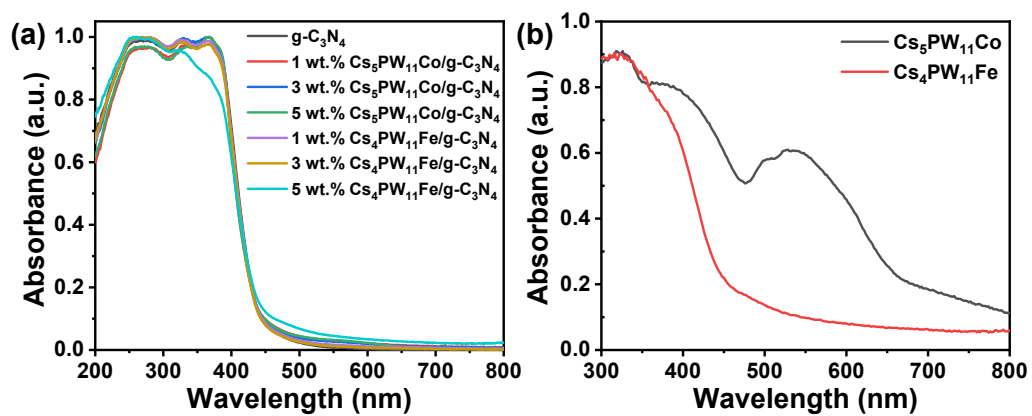

**Fig. S7.** UV-vis spectra (a) g-C<sub>3</sub>N<sub>4</sub> and Cs<sub>x</sub>PW<sub>11</sub>M/g-C<sub>3</sub>N<sub>4</sub> at different contents, (b) Cs<sub>x</sub>PW<sub>11</sub>M (M=Co, Fe).

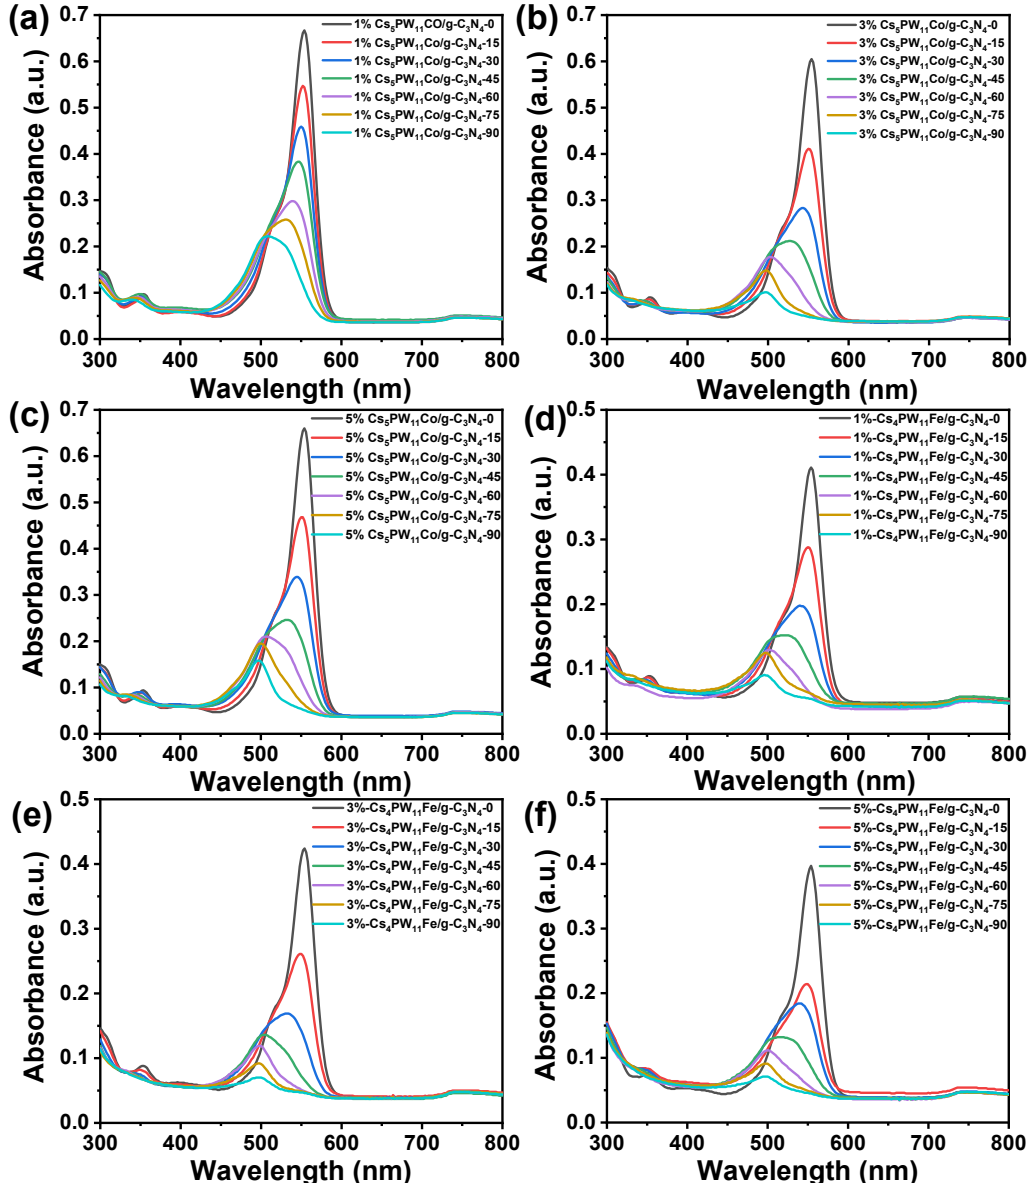

Fig. S8. (a-f) absorption spectral of RhB by  $\text{Cs}_x\text{PW}_{11}\text{M/g-C}_3\text{N}_4$ .

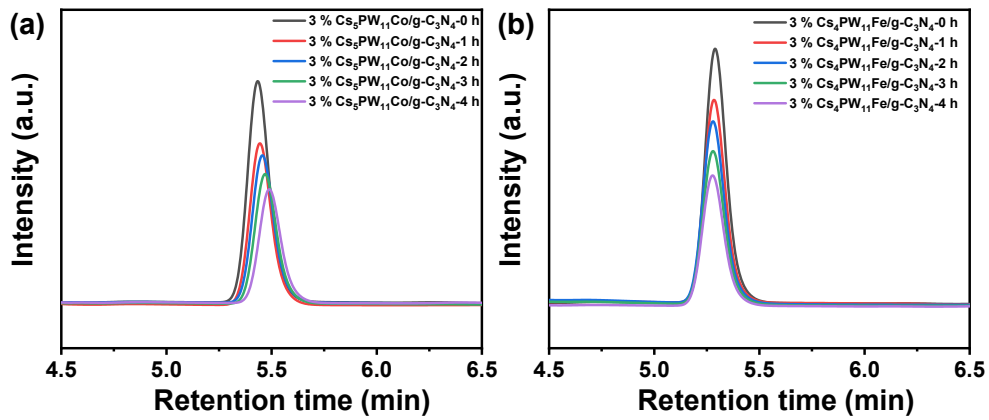

Fig. S9. (a, b) HPLC spectrums of BPA solution degraded by 3 wt.%  $\text{Cs}_x\text{PW}_{11}\text{M/g-C}_3\text{N}_4$ .

**Table S1.** Absolute electronegativity of each constituent element

| Atom   | Cs   | P    | W    | O    | Fe   | Co   |
|--------|------|------|------|------|------|------|
| X (eV) | 2.18 | 5.62 | 4.40 | 7.54 | 4.06 | 4.30 |

**Table S2.** Comparison of RhB degradation among different catalysts.

| Photocatalysts                                                     | Initial concentration       | Light source and irradiation time | Removal efficiency | Ref. |
|--------------------------------------------------------------------|-----------------------------|-----------------------------------|--------------------|------|
| Bi <sub>2</sub> WO <sub>6</sub> /ZnWO <sub>4</sub>                 | 10 mg/L                     | 500 W Xe lamp<br>4 h              | 89%                | S1   |
| NiS/ZnO                                                            | 2.01×10 <sup>-5</sup> mol/L | 8W UV-light<br>2h                 | 93%                | S2   |
| CeO <sub>2</sub> /CdS<br>quantum dots                              | 10 mg/L                     | 300 W Xe lamp<br>3 h              | 96.16%             | S3   |
| g-C <sub>3</sub> N <sub>4</sub> /H-TiO <sub>2</sub>                | 10 mg/L                     | 300 W Xe lamp<br>2 h              | 65%                | S4   |
| Bi <sub>3</sub> O <sub>4</sub> Cl/Bi <sub>5</sub> O <sub>7</sub> I | 17 ppm                      | 300 W Xe lamp<br>90 min           | 97%                | S5   |
| AgIO <sub>3</sub> /WO <sub>3</sub>                                 | 2×10 <sup>-5</sup> mol/L    | 300 W Xe lamp<br>140 min          | 100%               | S6   |
| BiOCl/H <sup>+</sup><br>TiNbO <sub>5</sub> <sup>-</sup>            | 10 mg/L                     | 250 W Xe lamp<br>90 min           | 99%                | S7   |
| g-C <sub>3</sub> N <sub>4</sub> /CQDs/CC                           | 5 mg/L                      | 250 W Xe lamp<br>90 min           | 92%                | S8   |

**Table S3.** Comparison of RhB degradation among g-C<sub>3</sub>N<sub>4</sub> based materials.

| Photocatalysts | Initial | Light source and | Removal | Ref. |
|----------------|---------|------------------|---------|------|
|----------------|---------|------------------|---------|------|

|                                                           | concentration | irradiation time                               | efficiency |     |
|-----------------------------------------------------------|---------------|------------------------------------------------|------------|-----|
| GQDs/mpg-C <sub>3</sub> N <sub>4</sub>                    | 10 mg/L       | 300 W Xe lamp<br>2 h                           | 97%        | S9  |
| Ultrathin g-C <sub>3</sub> N <sub>4</sub>                 | 30 ppm        | 300 W Xe lamp<br>90 min                        | 100%       | S10 |
| Thin porous<br>amino-rich g-C <sub>3</sub> N <sub>4</sub> | 10 mg/L       | 500 W Xe lamp<br>1 h                           | 99%        | S11 |
| g-C <sub>3</sub> N <sub>4</sub> /H-TiO <sub>2</sub>       | 10 mg/L       | 300 W Xe lamp<br>2 h                           | 65%        | S12 |
| S-g-C <sub>3</sub> N <sub>4</sub>                         | 10 mg/L       | 500W Xe lamp<br>2 h                            | 90%        | S13 |
| g-C <sub>3</sub> N <sub>4</sub> /CNTs                     | 10 mg/L       | 300 W Xe lamp<br>1 h                           | 98.1%      | S14 |
| Ag/AgCl-CN                                                | 5 mg/L        | 300 W Xe lamp<br>120 min<br>CEL-LED 100lamp 70 | 98.5%      | S15 |
| P-Cl/g-C <sub>3</sub> N <sub>4</sub>                      | 10 mg/L       | W<br>120 min                                   | 99.62%     | S16 |

## References

- S1 Y. Rao, H. Liu, B. Zhong, Z. Li, In-situ construction of Bi<sub>2</sub>WO<sub>6</sub>/ZnWO<sub>4</sub> heterojunctions with enhanced photocatalytic performance toward RhB degradation. *Mater. Lett.*, 2022, **312**, 131707.
- S2 S.K.Pandey, P. K. Mishra, D. Tiwary, Enhanced photocatalytic performance of NiS/ZnO nanocomposite for the remediation of PNP and RhB dye. *J. Environ. Chem. Eng.*, 2022, **10**, 107459.
- S3 H. Pei, Q. Jia, R. Guo, T. Zhang, N. Liu, Z. Mo, Flower-like CeO<sub>2</sub>/CdS quantum dots heterojunction nanocomposites with high photocatalytic activity for RhB degradation. *Colloids Surf., A*, 2022, **648**, 129256.
- S4 B. Yu, C. Miao, D. Wang, H. Li, D. Sun, W. Jiang, C. Liu, G. Che, Preparation of visible light responsive g-C<sub>3</sub>N<sub>4</sub>/H-TiO<sub>2</sub> Z-scheme heterojunction with enhanced photocatalytic activity for RhB degradation. *J. Mater. Sci.: Mater. Electron.*, 2022, **33**, 17587-17598.
- S5 S. T. U. Din, H. Lee, W. Yang, Z-Scheme Heterojunction of 3-Dimensional Hierarchical



- Bi<sub>3</sub>O<sub>4</sub>Cl/Bi<sub>5</sub>O<sub>7</sub>I for a Significant Enhancement in the Photocatalytic Degradation of Organic Pollutants (RhB and BPA). *Nanomaterials*, 2022, **12**, 767.
- S6 Q. Cao, Y. Zheng, X Song. Enhanced visible-light-driven photocatalytic degradation of RhB by AgIO<sub>3</sub>/WO<sub>3</sub> composites. *J. Taiwan Inst. Chem. Eng*, 2017, **70**, 359-365.
- S7 C. Liu, X. Gao, C. Zhang, T. Cheng, Y. Wang, Layered BiOCl/H<sup>+</sup> TiNbO<sub>5</sub><sup>-</sup> heterojunctions for boosting visible-light-driven photocatalytic RhB degradation. *Sustainable Energy Fuels*, 2021, **5**, 4680-4689.
- S8 B Zhu, X Li, Y Wang, N. Liu, Y. Tian, Visible-light-driven photocatalytic degradation of RhB by carbon-quantum-dot-modified g-C<sub>3</sub>N<sub>4</sub> on carbon cloth. *CrystEngComm*, 2021, **23**, 4782-4790.
- S9 J. Liu, H. Xu, Y. Xu, Y. Song, Graphene quantum dots modified mesoporous graphite carbon nitride with significant enhancement of photocatalytic activity. *Appl. Catal. B*, 2017, **207**, 429-437.
- S10 S. Gao, X. Wang, C. Song, S. Zhou, F. Yang and Y. Kong, Engineering carbon-defects on ultrathin g-C<sub>3</sub>N<sub>4</sub> allows one-pot output and dramatically boosts photoredox catalytic activity, *Appl. Catal. B*, 2021, **295**, 120272.
- S11 T. Huang, J. Chen, L. Zhang, Precursor-modified strategy to synthesize thin porous amino-rich graphitic carbon nitride with enhanced photocatalytic degradation of RhB and hydrogen evolution performances. *Chinese J. Catal.*, 2022, **43**, 497-506.
- S12 M. Ge, X. Li, Z. Liu, M. Zhang, Enhanced photocatalytic degradation performance of cyano groups-modified carbon nitride nanosheets synthesized by magadiite template-assisted thermal treatment. *Mater Sci Semicond Process*, 2022, **141**, 106420.
- S13 Q. Fan, J. Liu, Y. Yu, A simple fabrication for sulfur doped graphitic carbon nitride porous rods with excellent photocatalytic activity degrading RhB dye. *Appl. Surf. Sci.*, 2017, **391**, 360-368.
- S14 G. Liu, M. Liao, Z. Zhang, Enhanced photodegradation performance of Rhodamine B with g-C<sub>3</sub>N<sub>4</sub> modified by carbon nanotubes. *Sep. Purif. Technol.*, 2020, **244**, 116618.
- S15 H. Xu, Y. Chang, X. Shen, Construction of Ag/AgCl-CN heterojunctions with enhanced photocatalytic activities for degrading contaminants in wastewater. *J. Colloid Interface Sci.*, 2019, **543**, 25-33.
- S16 Y. Yang, H. Jin, C. Zhang, Nitrogen-deficient modified P-Cl co-doped graphitic carbon nitride with enhanced photocatalytic performance. *J. Alloys Compd.*, 2020, **821**, 153439.
